# Supplementary material for: Carbon nitride used as a reactive template to prepare mesoporous molybdenum sulfide and nitride
Source: Royal Society of Chemistry journal article supplement (doi:10.1039/d1ra03657b), 2021-01-01
Supplement: d1ra03657b1.pdf [file d1ra03657b1.pdf]

## SUPPLEMENTARY INFORMATION

### Carbon nitride used as a reactive template to prepare mesoporous molybdenum sulfide and nitride.

Daria Ryaboshapka, Pavel Afanasiev

Univ Lyon, Univ. Claude Bernard Lyon 1, CNRS, UMR5256, IRCELYON, F-69626, Villeurbanne, France.

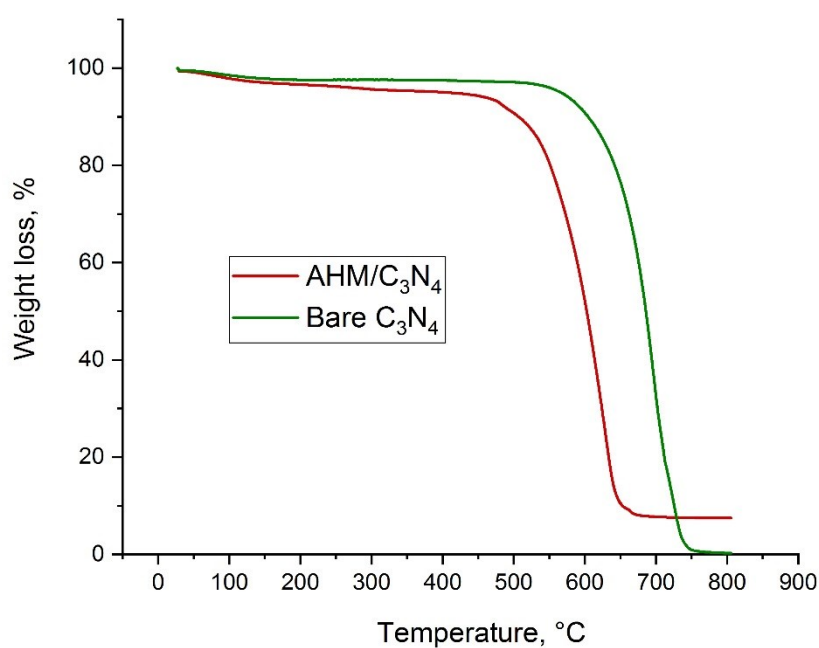

Fig. S1 TG curves for AHM/C<sub>3</sub>N<sub>4</sub> and bare C<sub>3</sub>N<sub>4</sub>

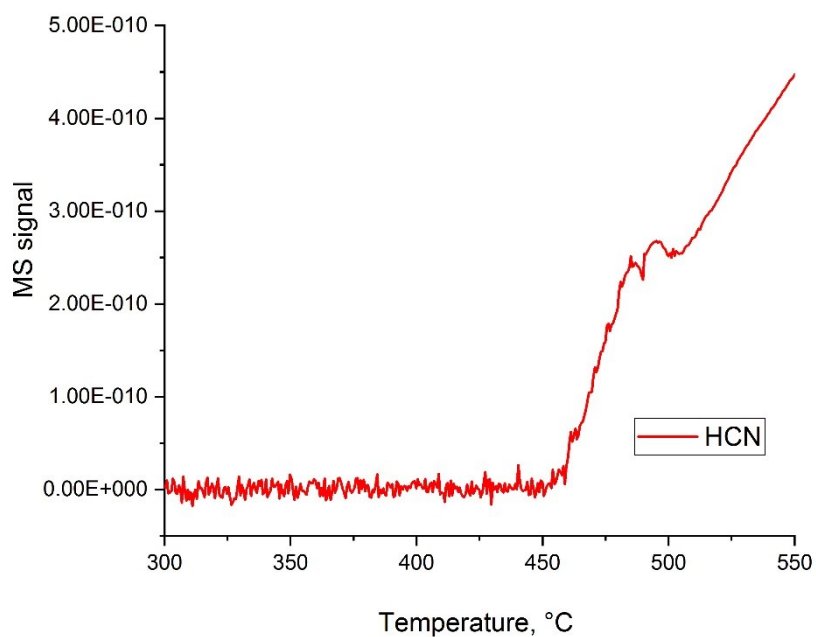

Fig. S2 Mass spectrum recorded during preparation of Mo<sub>2</sub>N-CN

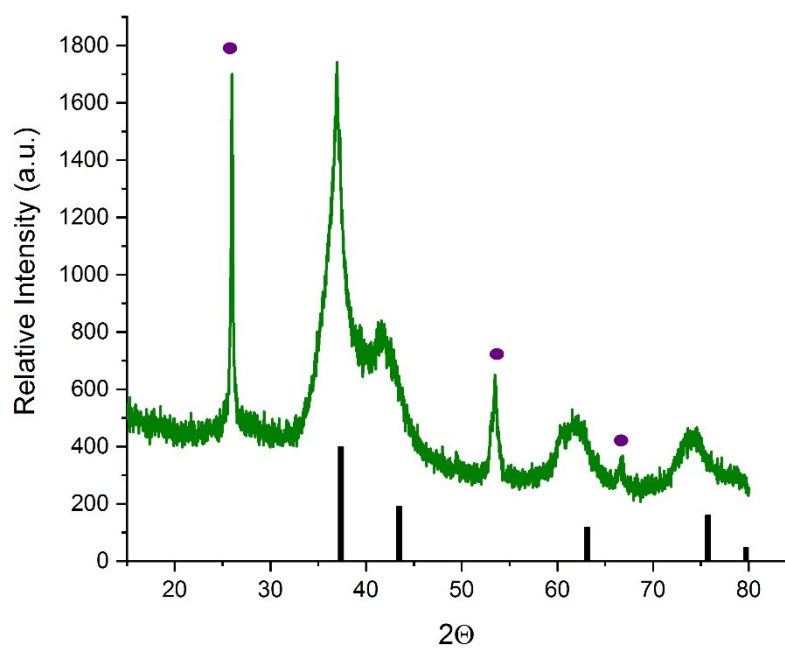

Fig. S3 Diffractogram of the sample prepared from AHM/C<sub>3</sub>N<sub>4</sub> in N<sub>2</sub> flow at 650 °C, black bars correspond to Mo<sub>2</sub>N phase (00-025-1366) and violet circles correspond to MoO<sub>2</sub> phase (01-078-1070)

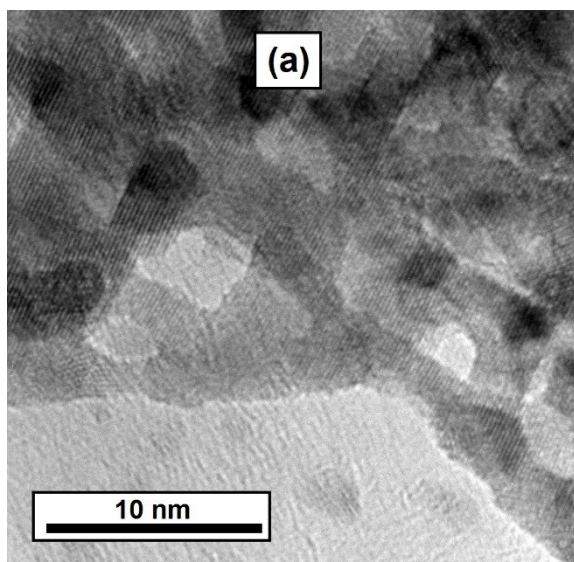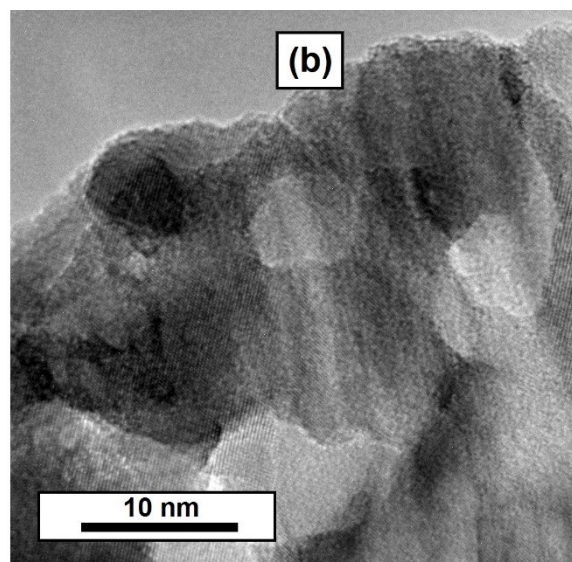

Fig. S4 TEM microphotographs of reference sample (AHM/C<sub>3</sub>N<sub>4</sub> treated in N<sub>2</sub> flow at 650 °C)

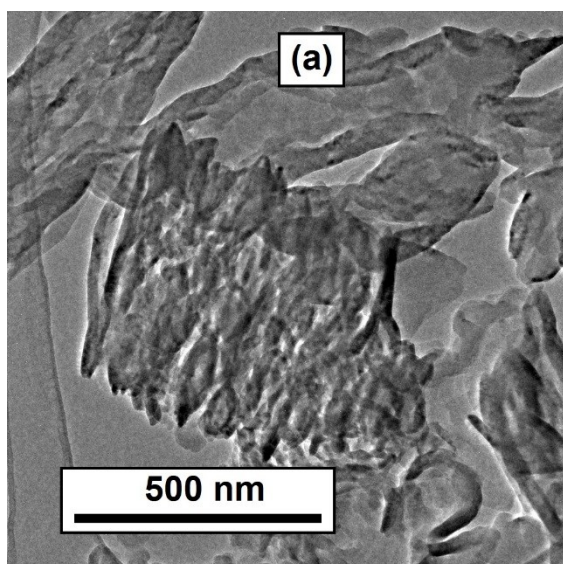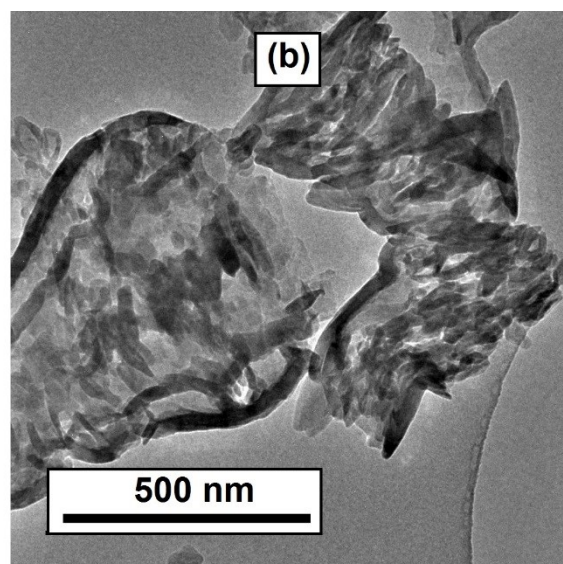

Fig. S5 Low magnification TEM images of C<sub>3</sub>N<sub>4</sub>

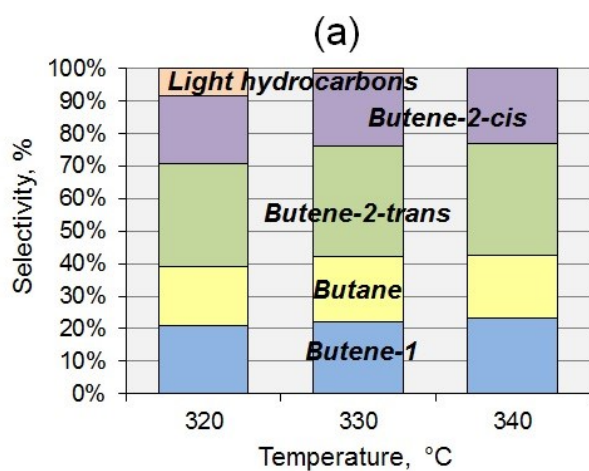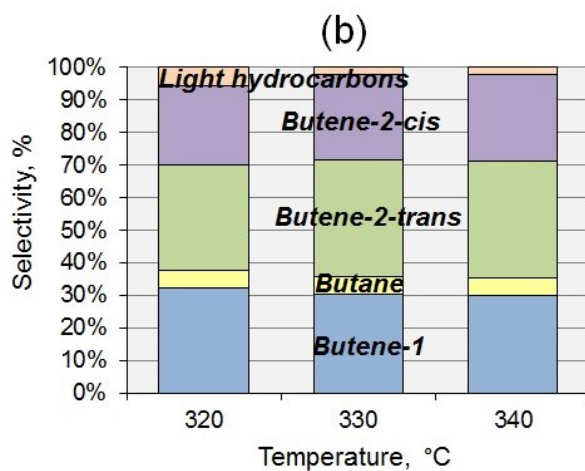

Fig. S6 Selectivity distributions in HDS for (a) Mo<sub>2</sub>N-CN, (b) MoS<sub>2</sub>-CN

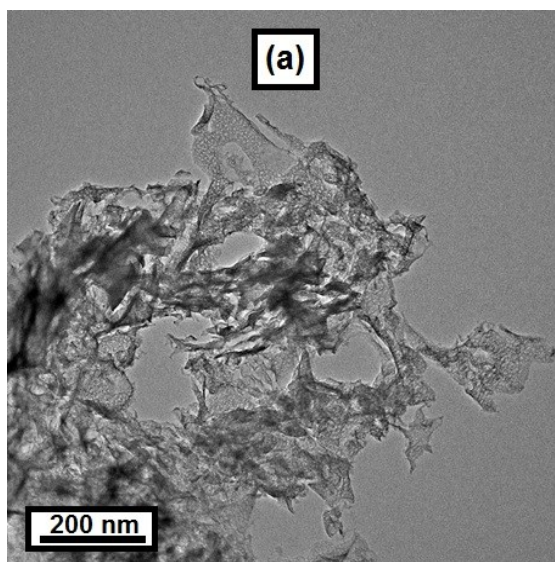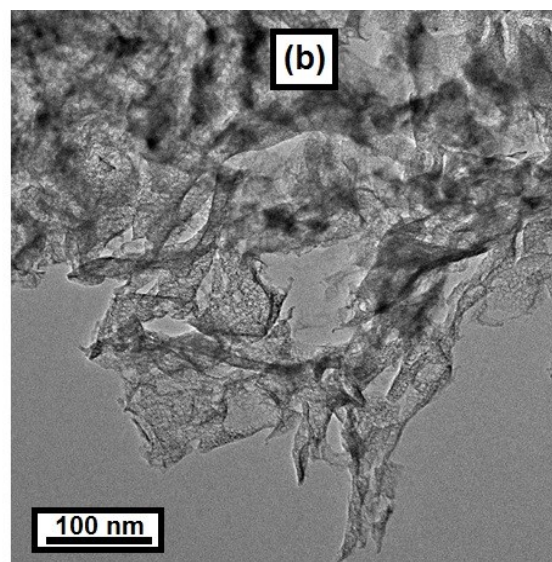

Fig. S7 TEM images of Mo<sub>2</sub>N-CN after HDS
